# Supplementary material
Source: Research Square preprint supplement (doi:10.21203/rs.3.rs-8855735/v1)
Supplement: Supplementary file 1 [file 3c4f77d2c3df4b7857e68574.docx]

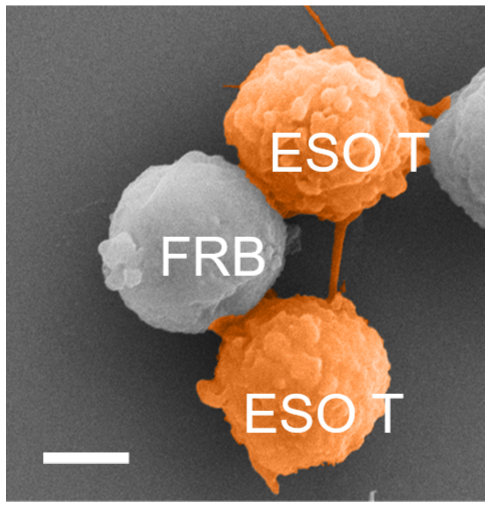


**Supplementary figure 1**

SEM imaging of the sorted NY-ESO-1-specific T (ESO-T) cells interacting with FRB at 2 hours, forming immunological synapses. Scale bar, 3μm.


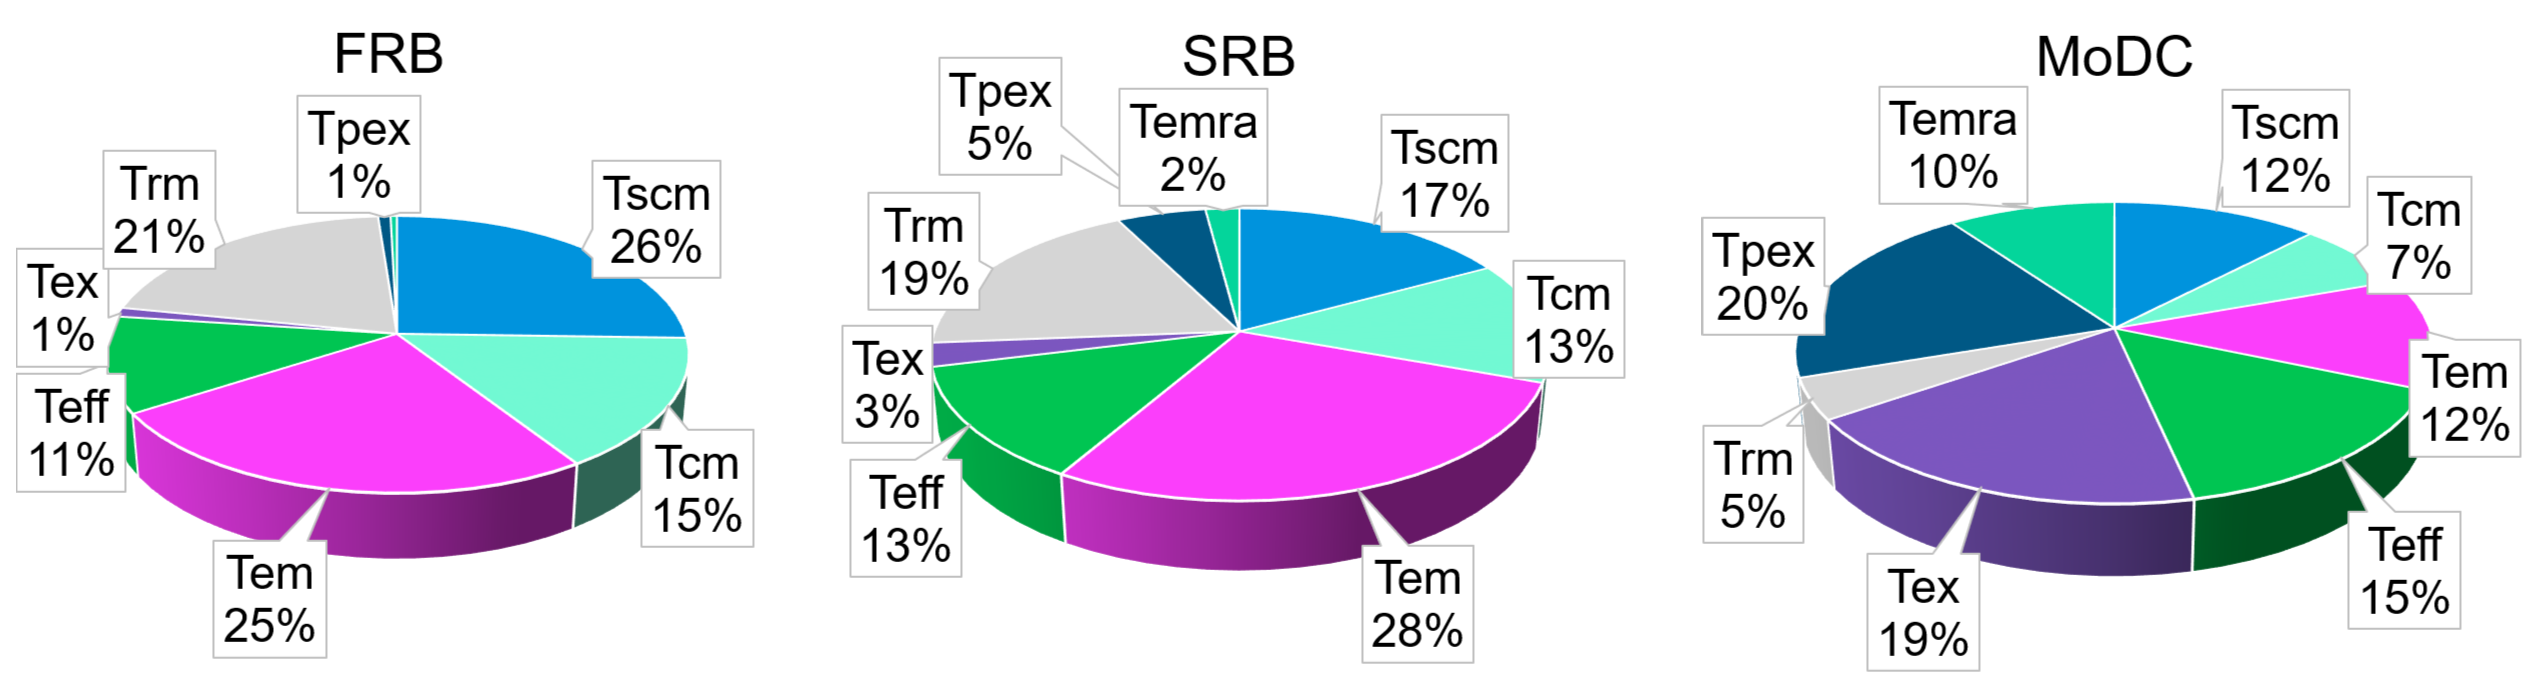


**Supplementary figure 2**

Pie chart of the percentage of the different cell clusters shown in Figure 3a.


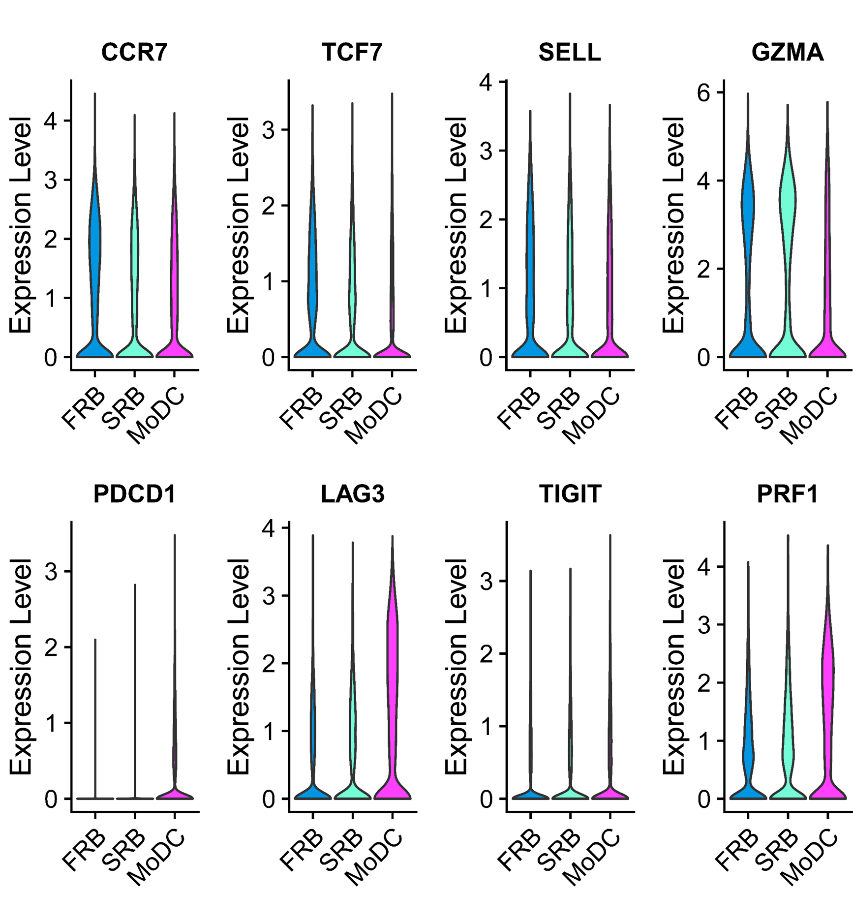


**Supplementary figure 3**

Violin plots of the gene expression shown in Figure 3c.


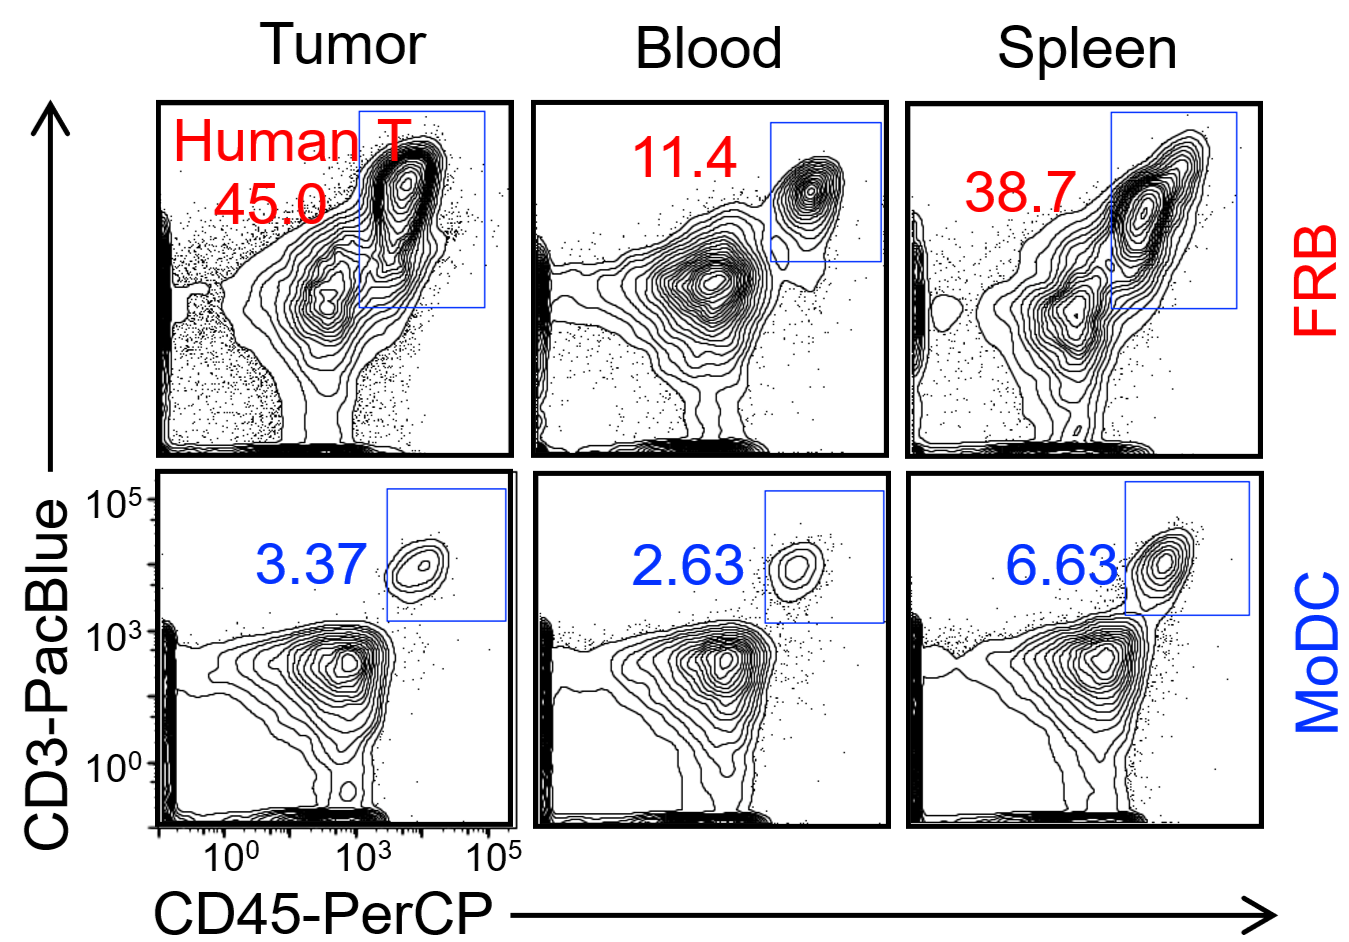


**Supplementary figure 4**

Representative flow cytometry results of the frequency of human T cells in the tumor, blood, and spleen at day 32.


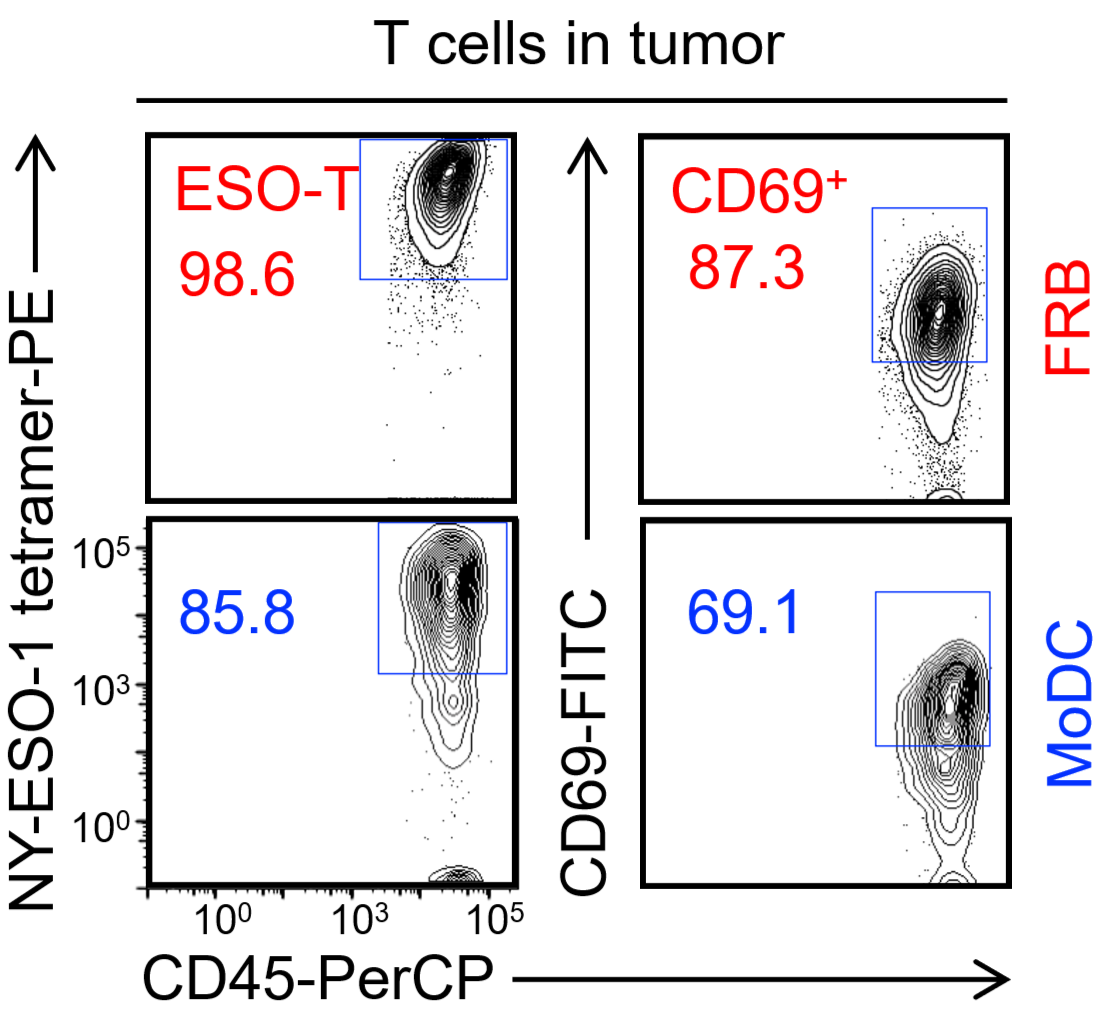


**Supplementary figure 5**

Representative flow cytometry results of the frequency of human ESO-T cells and CD69+ T cells in the tumor at day 32.
